# Supplementary material
Source: Springer Nature journal article supplement (https://www.springermedizin.de/resource/supplementary/13058_2012_3139_MOESM11_ESM.pdf/9703336)
Supplement: MOESM11 [file 9703336]

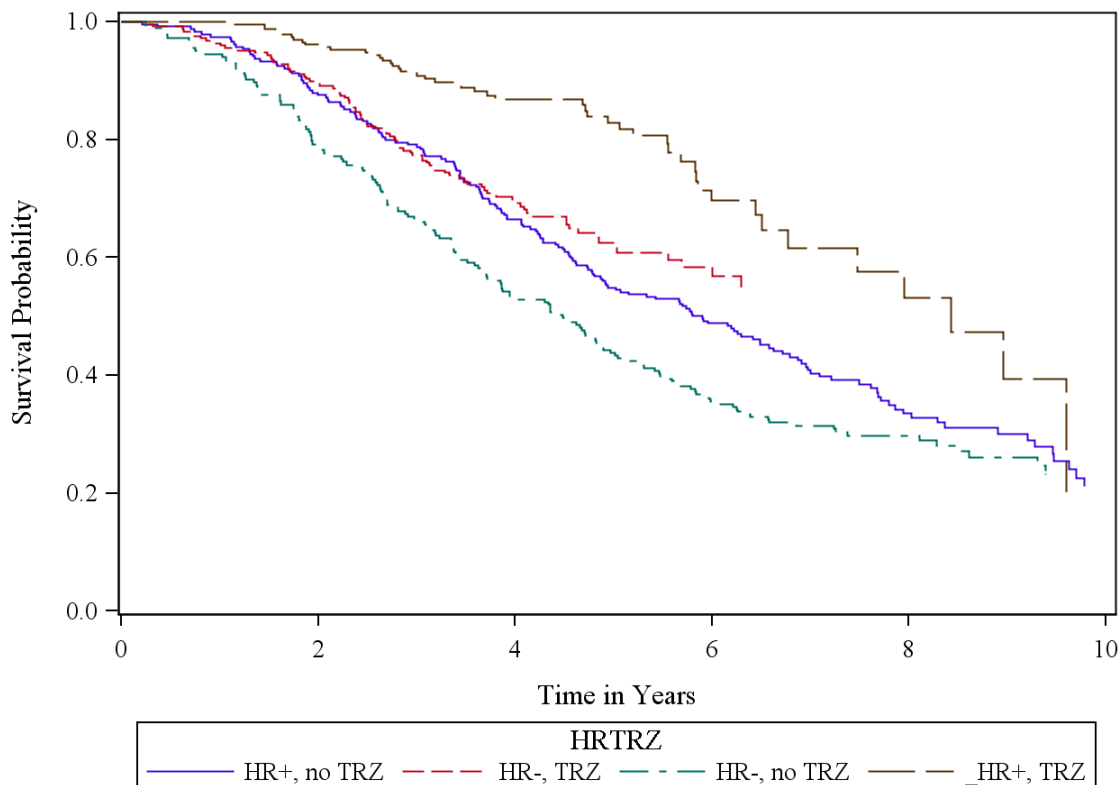

**Number at risk**

|                           |       |       |     |     |     |    |
|---------------------------|-------|-------|-----|-----|-----|----|
| <b>HR-positive TRZ</b>    | 837   | 811   | 478 | 143 | 43  | 8  |
| <b>HR-negative TRZ</b>    | 665   | 625   | 390 | 136 |     |    |
| <b>HR-positive No TRZ</b> | 1,178 | 1,115 | 926 | 617 | 266 | 93 |
| <b>HR-negative No TRZ</b> | 714   | 656   | 521 | 349 | 215 | 68 |

**Hazard Ratio (95% CI) P-value Hazard Ratio (95% CI) P-value Hazard Ratio (95% CI) P-value**

|                    | <b>HR-negative TRZ</b> |       | <b>HR-positive No TRZ</b> |       | <b>HR-negative No TRZ</b> |       |
|--------------------|------------------------|-------|---------------------------|-------|---------------------------|-------|
| <b>0-2 years</b>   | 2.84 (1.33, 6.06)      | 0.007 | 3.42 (1.59, 7.36)         | 0.002 | 6.01 (2.83,12.81)         | <.001 |
| <b>2-5 years</b>   | 2.58 (1.59, 4.20)      | <.001 | 3.07 (1.87, 5.03)         | <.001 | 3.97 (2.40, 6.57)         | <.001 |
| <b>&gt;5 years</b> | 0.41 (0.16, 1.05)      | 0.064 | 0.98 (0.56, 1.72)         | 0.952 | 0.93 (0.52, 1.67)         | 0.806 |
